# Supplementary material for: Protein corona alleviates adverse biological effects of nanoplastics in breast cancer cells
Source: Royal Society of Chemistry journal article supplement (doi:10.1039/d4nr01850h), 2024-01-01
Supplement: d4nr01850h1.pdf [file d4nr01850h1.pdf]

## Electronic Supplementary Information

Protein Corona Alleviates Adverse Biological Effects of Nanoplastics in Breast Cancer Cells

Siyao Xiao <sup>a</sup>, Junbiao Wang <sup>b</sup>, Luca Digiacomo <sup>a</sup>, Augusto Amici <sup>b</sup>, Valentina De Lorenzi<sup>c</sup>, Licia Anna Pugliese<sup>c</sup>, Francesco Cardarelli <sup>c</sup>, Andrea Cerrato,<sup>d</sup> Aldo Laganà,<sup>d</sup> Lishan Cui,<sup>e,f</sup> Massimiliano Papi,<sup>e,f</sup> Giulio Caracciolo <sup>a</sup>, Cristina Marchini <sup>\*b</sup>, Daniela Pozzi <sup>\*a</sup>

<sup>a</sup> NanoDelivery Lab, Department of Molecular Medicine, Sapienza University of Rome, Viale Regina Elena 291, 00161 Rome, Italy

<sup>b</sup> School of Biosciences and Veterinary Medicine, University of Camerino, 62032 Camerino, Italy

<sup>c</sup> Laboratorio NEST, Scuola Normale Superiore, Piazza San Silvestro 12, 56127 Pisa, Italy

<sup>d</sup> Department of Chemistry, Sapienza University of Rome, P.le A. Moro 5, 00185 Rome, Italy

<sup>e</sup> Department of Neuroscience, Catholic University of the Sacred Heart, Largo Francesco Vito 1, Rome 00168, Italy

<sup>f</sup> Fondazione Policlinico Universitario A. Gemelli IRCSS, Rome 00168, Italy

\* **corresponding authors:** [cristina.marchini@unicam.it](mailto:cristina.marchini@unicam.it) (C.M.); [daniela.pozzi@uniroma1.it](mailto:daniela.pozzi@uniroma1.it) (D.P.)

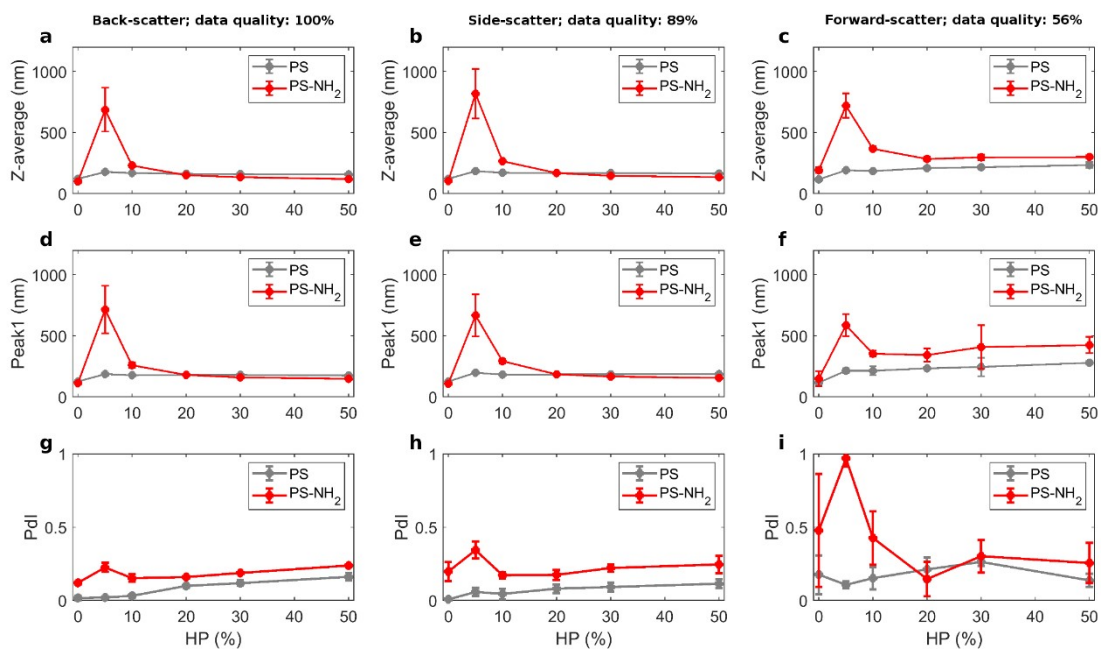

**Figure S1.** DLS data of NPs upon exposure to HP, at three different scattering angles, i.e.  $173^\circ$  (back scattering),  $90^\circ$  (side scattering), and  $17^\circ$  (forward scattering). Data quality is evaluated as percentage of replicates with good quality reports, as indicated by the Malvern Software for DLS data acquisition. (a, b, c) Z-average, (d-f) peak location, and (g-i) Pdl as functions of HP percentage.

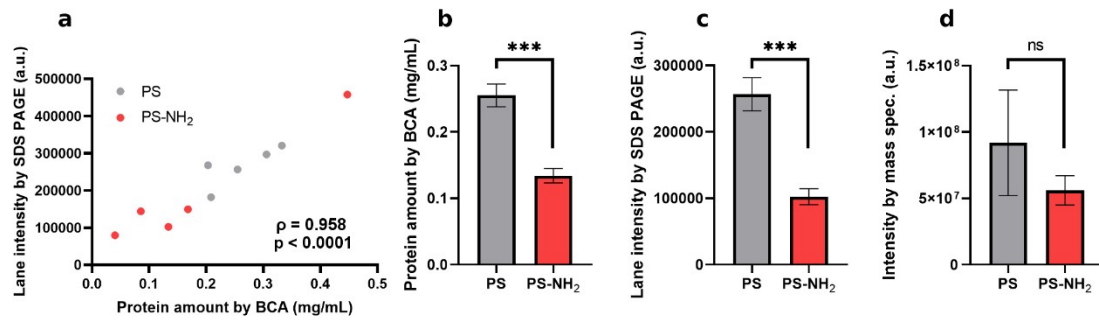

**Figure S2.** (a) Correlation analysis between total protein amount in the hard corona of NPs by BCA assay and total lane intensity by SDS-PAGE. (b) protein amount by BCA, (c) total lane intensity by SDS-PAGE, and (d) intensity by nano-liquid chromatography mass spectrometry experiments for unmodified PS NPs and NH<sub>2</sub>-PS NPs upon exposure to 30% HP. The obtained results clearly indicate a robust correspondence between BCA, SDS-PAGE, and proteomics analyses.

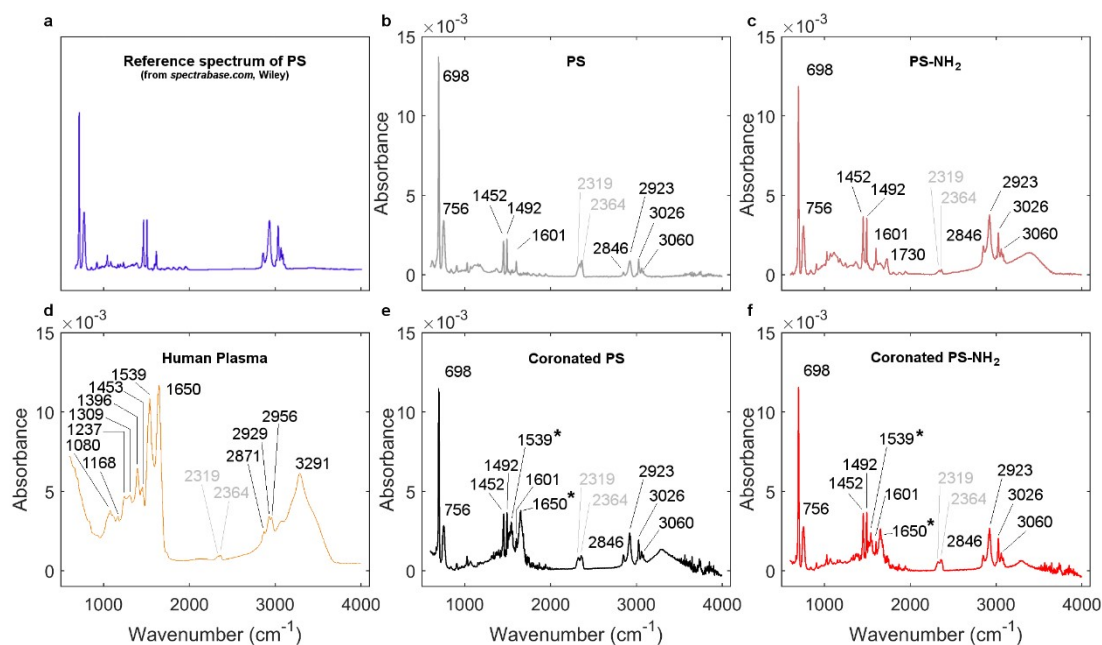

**Figure S3.** FT-IR analysis of pristine and coronated NPs. (a) Reference FT-IR spectrum for Polystyrene, as reported on spectrabase.com (John Wiley & Sons, Inc.). FT-IR spectra of (b) PS, (c) PS-NH<sub>2</sub>, (d) HP, (e) coronated PS, and (f) coronated PS-NH<sub>2</sub>. Asterisks indicate HP peaks found in coronated samples and absent in pristine systems.

FT-IR spectroscopy provided a chemical characterization of both pristine systems and nanoparticles (NPs) exposed to 30% human plasma (HP), hereafter referred to as coronated particles. Results are shown in Fig. S3 and clearly indicate that coronated particles exhibit distinct HP signatures in their FT-IR spectra, demonstrating the formation of a protein corona on their surfaces. In detail, a nominal spectrum for Polystyrene (Fig. S3 a) was used as a reference. Our experimental data for PS (Fig. S3 b) and PS-NH<sub>2</sub> showed very good agreement with the reference. The main discriminant feature between them was a characteristic peak for the amine-modified system, located at 1730 cm<sup>-1</sup>, likely attributable to surface functionalization. Other notable peaks included C-H out-of-plane bending vibration absorption (698 cm<sup>-1</sup>, 756 cm<sup>-1</sup>), C=C stretching vibration absorption (1450 cm<sup>-1</sup>, 1490 cm<sup>-1</sup>, 1600 cm<sup>-1</sup>), and C-H stretching vibration absorption (from 2800 cm<sup>-1</sup> to 3060 cm<sup>-1</sup>)<sup>1</sup>. Besides the observed matching between the experimental spectra and the reference, we note that the measured FT-IR curve for PS is very similar to those reported in previous studies. For instance, the measured locations of FT-IR peaks in Fig. S3 strongly agree with those reported by Fang et al. in 2009<sup>1</sup>. Similarly, the experimental FT-IR spectrum for HP (Fig. S3 d) matches those reported in previous studies, e.g. by Araújo et al in 2002<sup>2</sup>. HP spectrum exhibited a large number of absorption peaks, due to the intrinsic complexity of the biological specimen. Among them, two main contributions can be distinguished, i.e. amide I (1650 cm<sup>-1</sup>, C=O stretching vibration) and amide II band

(1539  $\text{cm}^{-1}$ , N–H bending and C–N stretching) <sup>3</sup>. Notably, these two peaks are differentially present in the spectra of both coronated PS (Fig. S3 e) and coronated PS-NH<sub>2</sub> (Fig. S3 f) systems, and provide demonstration of corona formation at the particle surface.

**Table S1** List of identified proteins in the corona of unmodified PS NPs and NH<sub>2</sub> PS NPs by nano-liquid chromatography tandem mass spectrometry analysis. Proteins are sorted in decreasing order of RPAs for the amine-modified systems.

| Protein name                             | Abbreviation | RPA (%) in PS NP corona | RPA (%) in PS-NH <sub>2</sub> corona |
|------------------------------------------|--------------|-------------------------|--------------------------------------|
| Apolipoprotein A-I                       | APOA1        | 19.20% ± 4.74%          | 21.11% ± 0.30%                       |
| Apolipoprotein A-II                      | APOA2        | 16.98% ± 4.01%          | 13.25% ± 1.17%                       |
| Apolipoprotein C-III                     | APOC3        | 3.80% ± 3.36%           | 13.13% ± 0.28%                       |
| Serum albumin                            | ALB          | 3.76% ± 0.71%           | 11.39% ± 0.42%                       |
| Apolipoprotein C-II                      | APOC2        | 2.74% ± 2.56%           | 7.31% ± 0.70%                        |
| Vitronectin                              | VTN          | 0.27% ± 0.22%           | 6.67% ± 1.01%                        |
| Clusterin                                | CLU          | 0.43% ± 0.27%           | 3.91% ± 0.06%                        |
| Apolipoprotein C-I                       | APOC1        | 1.53% ± 0.67%           | 2.85% ± 0.10%                        |
| Apolipoprotein E                         | APOE         | 1.28% ± 0.47%           | 2.50% ± 0.40%                        |
| Ig kappa chain C region                  | IGKC         | 1.22% ± 0.80%           | 2.15% ± 0.11%                        |
| Apolipoprotein A-IV                      | APOA4        | 0.08% ± 0.00%           | 1.71% ± 0.39%                        |
| Ig gamma-1 chain C region                | IGHG1        | 0.80% ± 0.99%           | 1.29% ± 0.40%                        |
| Keratin, type II cytoskeletal 1          | KRT1         | 0.51% ± 0.03%           | 1.08% ± 0.12%                        |
| Prothrombin                              | F2           | 0.00% ± 0.00%           | 1.07% ± 0.02%                        |
| Serum paraoxonase/arylesterase 1         | PON1         | 0.00% ± 0.00%           | 0.96% ± 0.04%                        |
| Fibrinogen gamma chain                   | FGG          | 13.05% ± 0.51%          | 0.94% ± 0.14%                        |
| C4b-binding protein alpha chain          | C4BPA        | 0.34% ± 0.00%           | 0.89% ± 0.04%                        |
| Ig gamma-3 chain C region                | IGHG3        | 1.66% ± 0.05%           | 0.82% ± 0.03%                        |
| Ig mu chain C region                     | IGHM         | 0.17% ± 0.10%           | 0.71% ± 0.15%                        |
| Fibrinogen alpha chain                   | FGA          | 11.51% ± 1.68%          | 0.68% ± 0.15%                        |
| Immunoglobulin lambda-like polypeptide 5 | IGLL5        | 3.91% ± 0.92%           | 0.67% ± 0.12%                        |
| Keratin, type I cytoskeletal 10          | KRT10        | 0.37% ± 0.04%           | 0.60% ± 0.13%                        |
| Immunoglobulin lambda constant 3         | IGLC3        | 2.79% ± 0.58%           | 0.59% ± 0.11%                        |
| Fibrinogen beta chain                    | FGB          | 6.38% ± 4.22%           | 0.54% ± 0.06%                        |
| Complement C4-B                          | C4B;C4A      | 0.13% ± 0.05%           | 0.48% ± 0.06%                        |
| Keratin, type I cytoskeletal 9           | KRT9         | 0.14% ± 0.01%           | 0.34% ± 0.07%                        |
| Haptoglobin                              | HP           | 0.48% ± 0.26%           | 0.33% ± 0.19%                        |
| Hyaluronan-binding                       | HABP2        | 0.00% ± 0.00%           | 0.31% ± 0.07%                        |

|                                              |               |  |       |   |       |       |         |
|----------------------------------------------|---------------|--|-------|---|-------|-------|---------|
| protein 2                                    |               |  |       |   |       |       |         |
| Ig alpha-1 chain C region                    | IGHA1;IGHA2   |  | 0.22% | ± | 0.11% | 0.30% | ± 0.00% |
| Alpha-1-antitrypsin                          | SERPINA1      |  | 0.10% | ± | 0.05% | 0.20% | ± 0.06% |
| Serum amyloid protein                        | A-4 SAA4      |  | 0.31% | ± | 0.06% | 0.18% | ± 0.03% |
| Complement subcomponent                      | C1q C1QC      |  | 0.80% | ± | 0.12% | 0.15% | ± 0.01% |
| Complement subunit C3                        | C3            |  | 0.59% | ± | 0.06% | 0.13% | ± 0.02% |
| Ig gamma-2 chain region                      | C IGHG2       |  | 0.07% | ± | 0.08% | 0.11% | ± 0.03% |
| Keratin, type II cytoskeletal 2 epidermal    | KRT2          |  | 0.15% | ± | 0.03% | 0.11% | ± 0.05% |
| Apolipoprotein D                             | APOD          |  | 0.00% | ± | 0.00% | 0.09% | ± 0.08% |
| Apolipoprotein C-IV                          | APOC4         |  | 0.01% | ± | 0.01% | 0.09% | ± 0.12% |
| Serotransferrin                              | TF            |  | 0.29% | ± | 0.18% | 0.08% | ± 0.00% |
| Ceruloplasmin                                | CP            |  | 0.01% | ± | 0.02% | 0.06% | ± 0.01% |
| Serum amyloid protein                        | A-1 SAA1;SAA2 |  | 0.16% | ± | 0.20% | 0.04% | ± 0.06% |
| Properdin                                    | CFP           |  | 0.20% | ± | 0.03% | 0.03% | ± 0.04% |
| Vitamin K-dependent protein S                | PROS1         |  | 0.02% | ± | 0.02% | 0.03% | ± 0.01% |
| Alpha-2-HS-glycoprotein                      | AHSG          |  | 0.15% | ± | 0.06% | 0.02% | ± 0.00% |
| Complement subcomponent                      | C1s C1S       |  | 0.03% | ± | 0.01% | 0.01% | ± 0.00% |
| Glutathione peroxidase 3                     | GPX3          |  | 0.02% | ± | 0.02% | 0.01% | ± 0.02% |
| Protein AMBP                                 | AMBP          |  | 0.00% | ± | 0.00% | 0.01% | ± 0.02% |
| Apolipoprotein B-100                         | APOB          |  | 0.01% | ± | 0.01% | 0.01% | ± 0.00% |
| Alpha-2-macroglobulin                        | A2M           |  | 0.04% | ± | 0.01% | 0.01% | ± 0.00% |
| Inter-alpha-trypsin inhibitor heavy chain H2 | ITIH2         |  | 0.03% | ± | 0.01% | 0.01% | ± 0.01% |
| Apolipoprotein L1                            | APOL1         |  | 0.01% | ± | 0.02% | 0.01% | ± 0.01% |
| Apolipoprotein(a)                            | LPA           |  | 0.00% | ± | 0.00% | 0.01% | ± 0.01% |
| Complement factor H                          | CFH           |  | 0.23% | ± | 0.06% | 0.01% | ± 0.00% |
| Complement subcomponent                      | C1r C1R       |  | 0.05% | ± | 0.00% | 0.00% | ± 0.01% |
| Keratin, type I cytoskeletal 13              | KRT13         |  | 0.00% | ± | 0.00% | 0.00% | ± 0.00% |
| Inter-alpha-trypsin inhibitor heavy chain H1 | ITIH1         |  | 0.01% | ± | 0.02% | 0.00% | ± 0.00% |
| Tetranectin                                  | CLEC3B        |  | 0.03% | ± | 0.04% | 0.00% | ± 0.00% |
| Hornerin                                     | HRNR          |  | 0.00% | ± | 0.00% | 0.00% | ± 0.00% |
| Complement component C9                      | C9            |  | 0.00% | ± | 0.00% | 0.00% | ± 0.00% |
| Gelsolin                                     | GSN           |  | 0.31% | ± | 0.00% | 0.00% | ± 0.00% |

|                                                            |                  |       |   |       |       |   |       |
|------------------------------------------------------------|------------------|-------|---|-------|-------|---|-------|
| Ig lambda chain V region 4A                                | IGLV7-46         | 0.05% | ± | 0.07% | 0.00% | ± | 0.00% |
| Ig lambda chain V-III region LOI                           | IGLV3-9;IGLV3-12 | 0.01% | ± | 0.01% | 0.00% | ± | 0.00% |
| Ig lambda-7 chain C region                                 | IGLC7            | 0.03% | ± | 0.04% | 0.00% | ± | 0.00% |
| CD5 antigen-like                                           | CD5L             | 0.01% | ± | 0.00% | 0.00% | ± | 0.00% |
| Plasminogen                                                | PLG              | 0.06% | ± | 0.02% | 0.00% | ± | 0.00% |
| Complement factor B                                        | CFB              | 0.03% | ± | 0.02% | 0.00% | ± | 0.00% |
| Alpha-1-antichymotrypsin                                   | SERPINA3         | 0.01% | ± | 0.01% | 0.00% | ± | 0.00% |
| Complement C5                                              | C5               | 0.00% | ± | 0.00% | 0.00% | ± | 0.00% |
| Kininogen-1                                                | KNG1             | 0.06% | ± | 0.05% | 0.00% | ± | 0.00% |
| Ig kappa chain V-III region B6                             | IGKV3D-20        | 0.03% | ± | 0.01% | 0.00% | ± | 0.00% |
| Ig lambda chain V-III region SH                            |                  | 0.04% | ± | 0.06% | 0.00% | ± | 0.00% |
| Ig gamma-4 chain C region                                  | IGHG4            | 0.05% | ± | 0.00% | 0.00% | ± | 0.00% |
| Complement subcomponent subunit A                          | C1q C1QA         | 0.39% | ± | 0.13% | 0.00% | ± | 0.00% |
| Complement subcomponent subunit B                          | C1q C1QB         | 0.43% | ± | 0.31% | 0.00% | ± | 0.00% |
| Beta-2-glycoprotein 1                                      | APOH             | 0.47% | ± | 0.01% | 0.00% | ± | 0.00% |
| Fibronectin                                                | FN1              | 0.08% | ± | 0.03% | 0.00% | ± | 0.00% |
| Hemopexin                                                  | HPX              | 0.03% | ± | 0.01% | 0.00% | ± | 0.00% |
| Plasma kallikrein                                          | KLKB1            | 0.04% | ± | 0.04% | 0.00% | ± | 0.00% |
| Histidine-rich glycoprotein                                | HRG              | 0.01% | ± | 0.02% | 0.00% | ± | 0.00% |
| Heparin cofactor 2                                         | SERPIND1         | 0.01% | ± | 0.00% | 0.00% | ± | 0.00% |
| Alpha-2-antiplasmin                                        | SERPINF2         | 0.01% | ± | 0.00% | 0.00% | ± | 0.00% |
| Hemoglobin subunit alpha                                   | HBA1;HBZ         | 0.07% | ± | 0.04% | 0.00% | ± | 0.00% |
| Complement factor H-related protein 1                      | CFHR1            | 0.04% | ± | 0.00% | 0.00% | ± | 0.00% |
| Inter-alpha-trypsin inhibitor heavy chain H4               | ITIH4            | 0.63% | ± | 0.30% | 0.00% | ± | 0.00% |
| Testis- and ovary-specific PAZ domain-containing protein 1 | TOPAZ1           | 0.01% | ± | 0.01% | 0.00% | ± | 0.00% |
| Proteoglycan 4                                             | PRG4             | 0.01% | ± | 0.01% | 0.00% | ± | 0.00% |



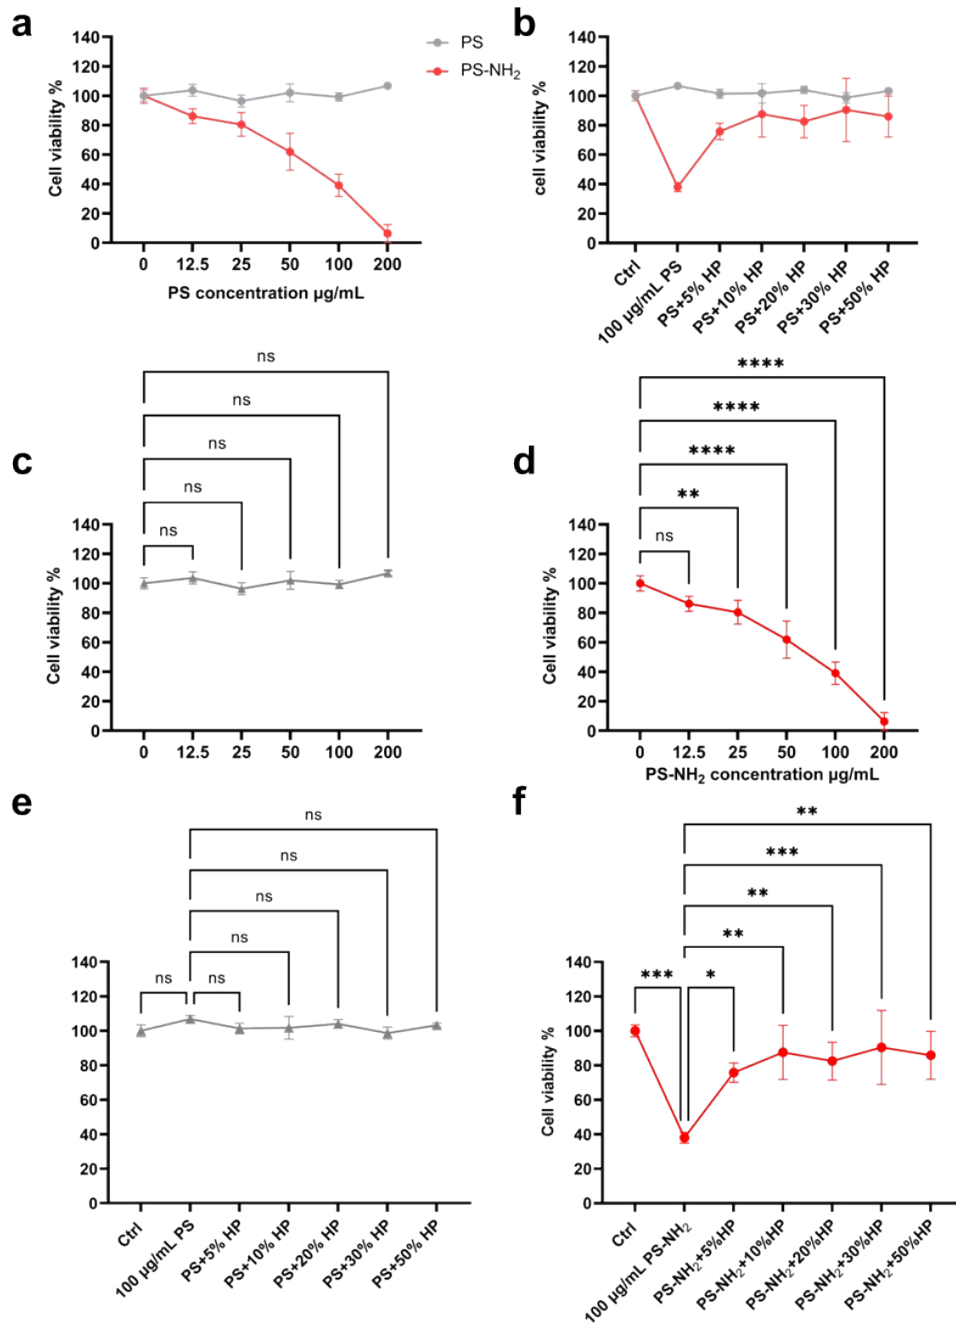

**Figure S4. The effect of PS NPs, PS-NH<sub>2</sub> NPs and their protein-coated forms on HEK-293 cell viability.** Cell viability of HEK-293 cells upon incubation with various concentrations of pristine PS or protein-coated PS for 72 h. Results are expressed as the percentage of living cells to untreated cells. Data are reported as mean  $\pm$  SD,  $n \geq 6$ . \*  $p < 0.05$ ; \*\*  $p < 0.01$ ; \*\*\*\*  $p < 0.0001$ , ordinary one-way ANOVA followed by Dunnett test.

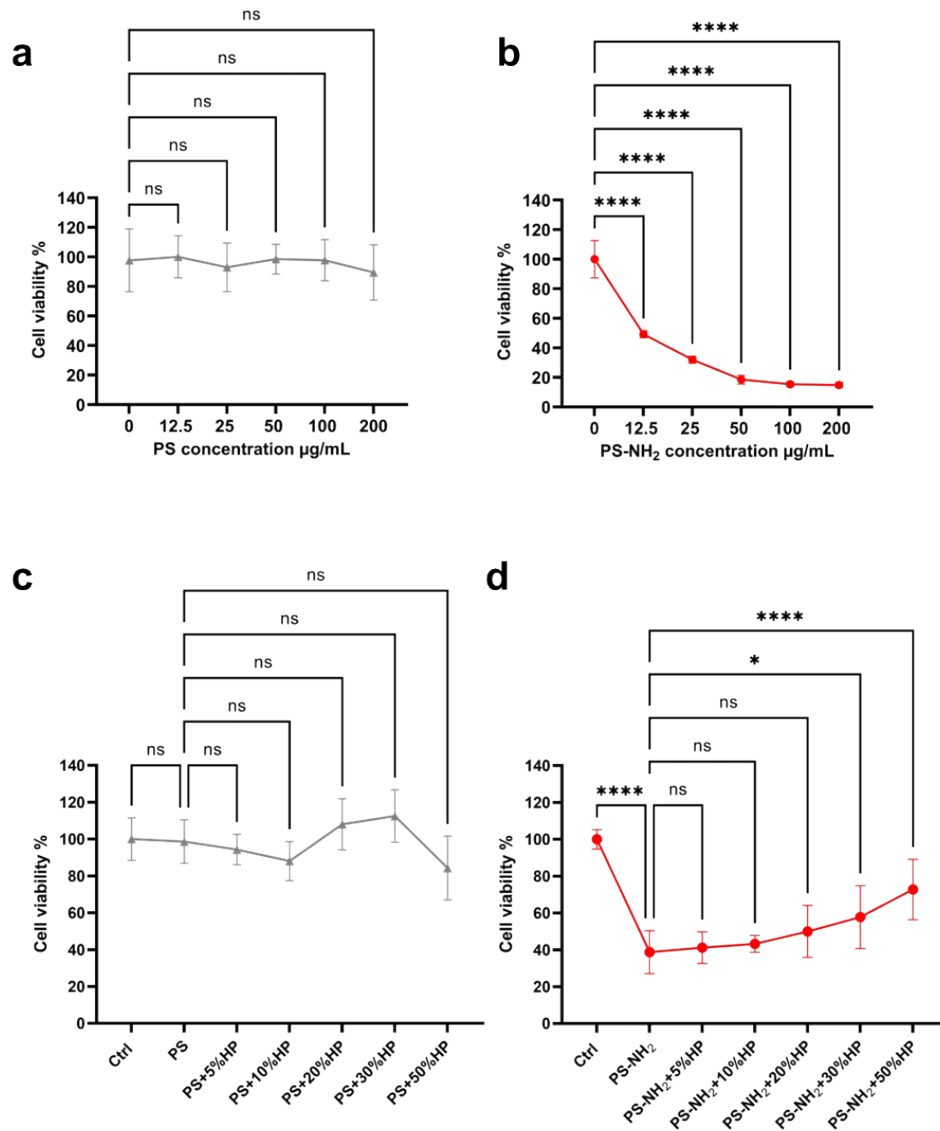

**Figure S5. Statistical Analysis of cytotoxicity.** Cell viability of SK-BR-3 cells upon incubation with various concentrations of pristine PS or protein-coated PS for 72 h. Results are expressed as the percentage of living cells to untreated cells. Data are reported as mean  $\pm$  SD,  $n \geq 6$ . \*  $p < 0.05$ ; \*\*  $p < 0.01$ ; \*\*\*\*  $p < 0.0001$ , ordinary one-way ANOVA followed by Dunnett test.

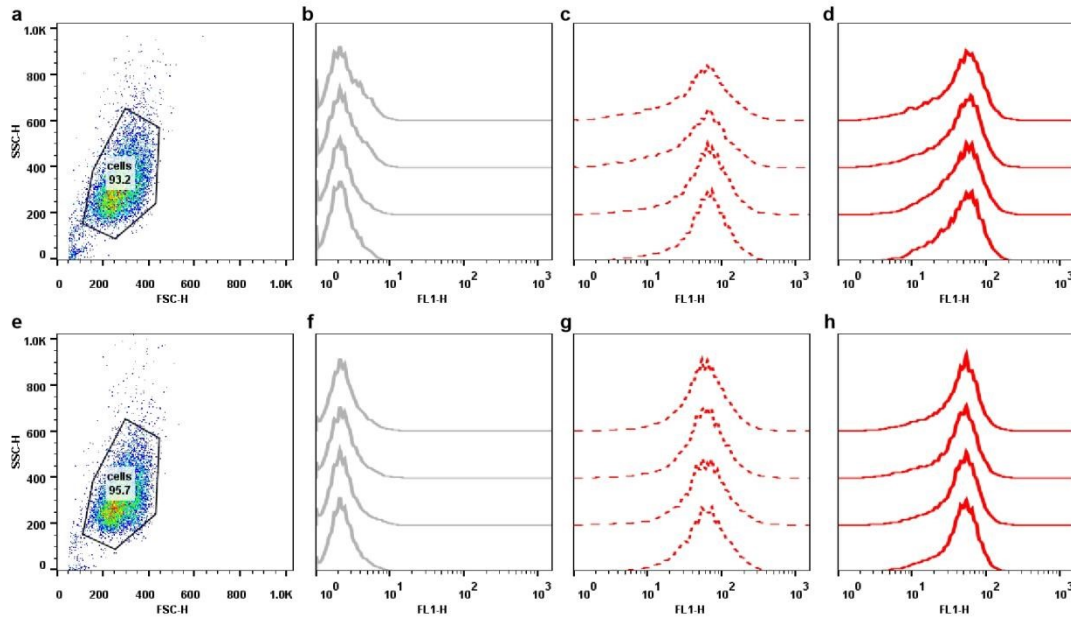

**Fig S6. Gating strategy and histograms of the flow cytometry experiments.** The results were obtained from two independent experiments (panel a-d from experiment 1 and e-h from experiment 2). SK-BR-3 cells were analyzed by forward scatter and sideward scatter to identify the cell population of interest and exclude cell debris, gating strategy was represented in panel a and e, and the gating was applied to all samples. PS-NH<sub>2</sub> NPs were labeled with an orange dye (Approximate Exi/Emi of 481/644 nm), and the events of the cell gate were analyzed for their fluorescence (excitation 488 nm, detected in FL1 channel, band-pass filter 530/30 nm). Within each experiment, we have 4 replicates, and the fluorescence distribution of control group (b, f), treated with pristine PS-NH<sub>2</sub> group (c,g), and treated with coronated PS-NH<sub>2</sub> group (d, h).

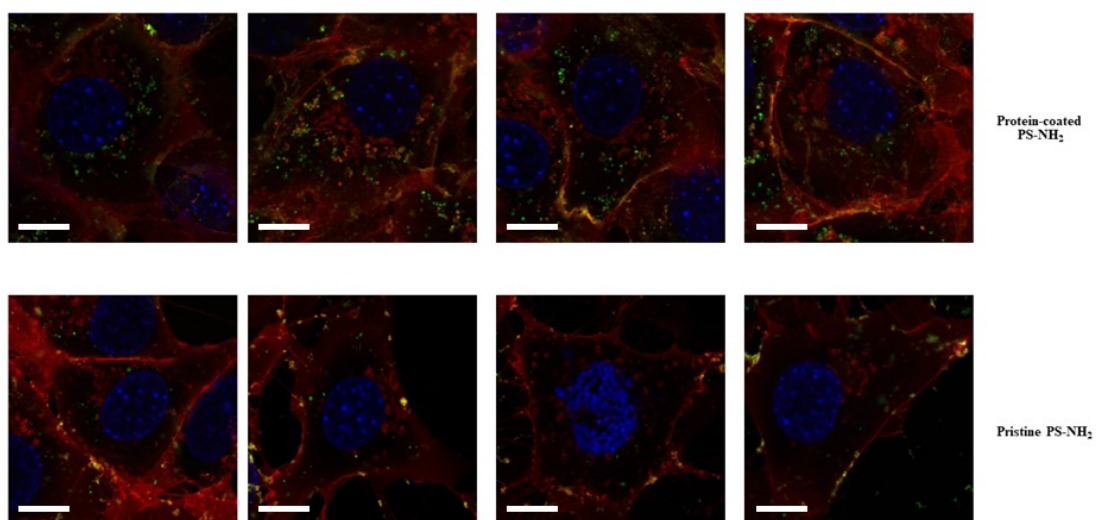

**Fig. S7. Confocal microscopy images of 100 nm PS-NH<sub>2</sub> NPs internalized by NIH3T3 fibroblasts.** NIH3T3 fibroblasts were treated under the same condition as SK-BR-3 cells, red represents CellMask™, blue represents nucleus stained with Hoechst 33,342, protein coated PS-NH<sub>2</sub> NPs and pristine PS-NH<sub>2</sub> NPs are indicated in green. Scale bars 10  $\mu$ m. The results suggested the similar trend as observed in SK-BR-3 cells: pristine PS-NH<sub>2</sub> NPs tend to stick to the cell membrane, while protein pre-coating enhance their cellular uptake.

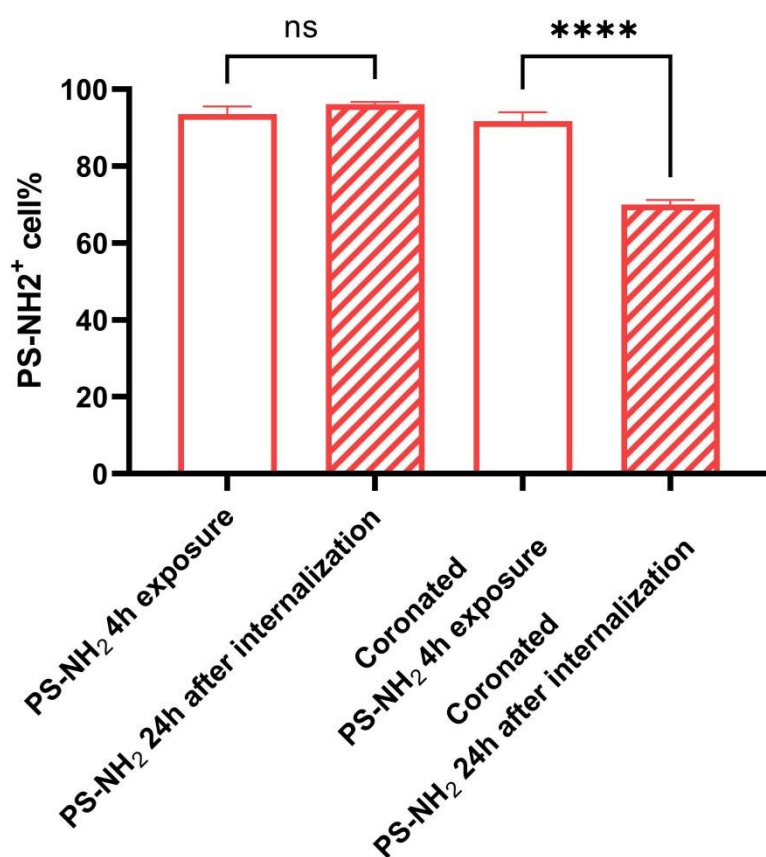

**Fig S8. Cellular release of internalized PS-NH<sub>2</sub>.** SK-BR-3 cells were exposed to 12.5  $\mu\text{g}/\text{mL}$  pristine or coronated PS-NH<sub>2</sub> NPs for 4h. After the exposure, the culture medium was removed, the cells were washed gently with PBS three times and replaced with PS-NH<sub>2</sub>-free medium, 24 h after the replacement, cellular uptake was measured by PS-NH<sub>2</sub> positive cell percentage using flow cytometry. Data are reported as mean  $\pm$  SD,  $n \geq 4$ . \*  $p < 0.05$ ; \*\*  $p < 0.01$ ; \*\*\*\*  $p < 0.0001$ , ordinary one-way ANOVA followed by Tukey test.

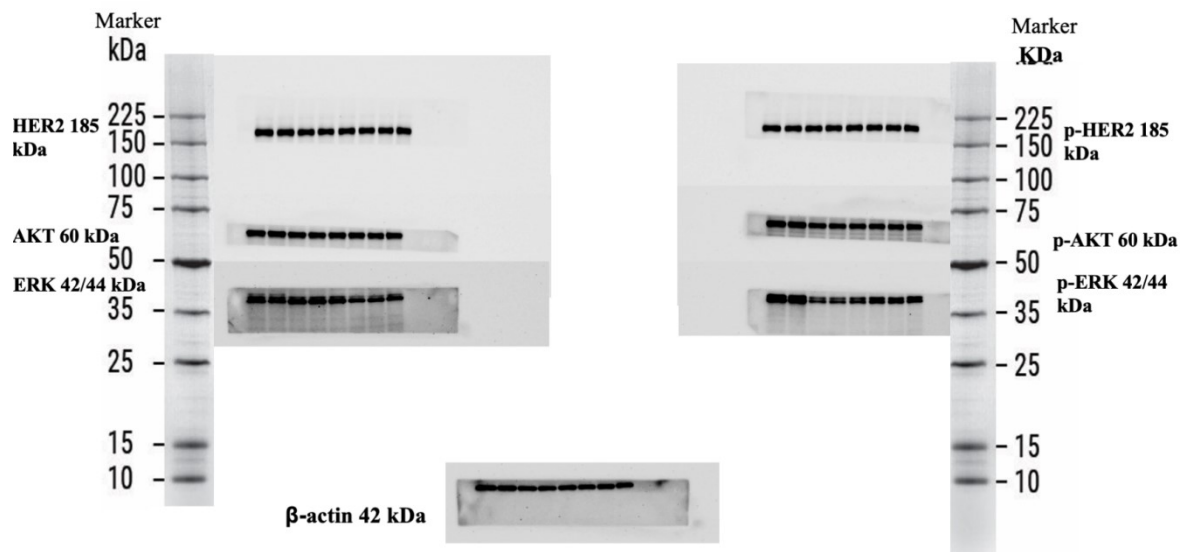

**Fig. S9. Original western blots from which Figure 6 (Panel a) derived.** Analysis of the expression levels of HER2, pHER2, AKT, pAKT, ERK, pERK and  $\beta$ -actin in SK-BR-3 cells treated or not with 12.5  $\mu\text{g}/\text{mL}$  pristine or protein-coated PS-NH<sub>2</sub> for 24 h. Equal amounts of protein (20  $\mu\text{g}$ ) were loaded, and  $\beta$ -actin was used as loading control. Since  $\beta$ -actin and ERK have the same Molecular Weight, the membranes were stripped and re-blotted to detect  $\beta$ -actin. Samples were loaded as following order: control in duplicate, cell treated with 12.5  $\mu\text{g}/\text{mL}$  PS-NH<sub>2</sub> in triplicate and coronated PS-NH<sub>2</sub> in triplicate.

## References

1. Fang, J.; Xuan, Y.; Li, Q., Preparation of polystyrene spheres in different particle sizes and assembly of the PS colloidal crystals. *Science China Technological Sciences* **2010**, *53*, 3088-3093.
2. Araújo, R.; Ramalheite, L.; Ribeiro, E.; Calado, C., Plasma versus Serum Analysis by FTIR Spectroscopy to Capture the Human Physiological State. *BioTech* **2022**, *11* (4), 56.
3. Crocco, M. C.; Moyano, M. F. H.; Annesi, F.; Bruno, R.; Pirritano, D.; Del Giudice, F.; Petrone, A.; Condino, F.; Guzzi, R., ATR-FTIR spectroscopy of plasma supported by multivariate analysis discriminates multiple sclerosis disease. *Scientific Reports* **2023**, *13* (1), 2565.
